# Supplementary material for: Transferrin plays a central role in coagulation balance by interacting with clotting factors
Source: PubMed Central journal article supplement (PMC7015052; doi:10.1038/s41422-019-0260-6), 2019-12-06
Supplement: 41422_2019_260_MOESM4_ESM.pdf [file 41422_2019_260_MOESM4_ESM.pdf]

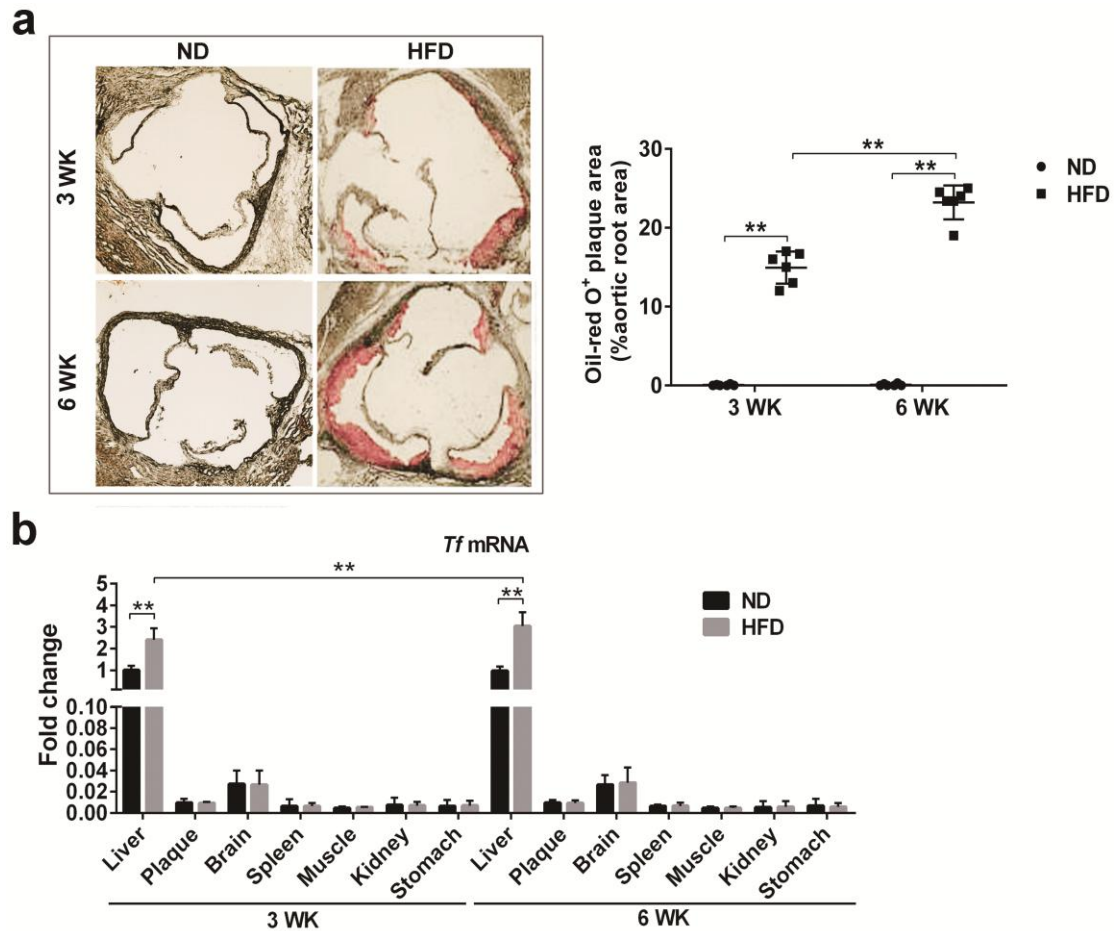

**Fig. S3 HFD-induced atherosclerosis and tissue distribution of transferrin mRNA in mice.** (a) *ApoE*<sup>-/-</sup> mice were fed a normal diet (ND) or high fat diet (HFD) for 3 or 6 weeks (WK), with representative images of oil-red O-stained plaques in aortic root area (left) and quantitative results of stained area (right) shown. (b) Transferrin mRNA expression in different tissues (liver, plaque, brain, spleen, muscle, kidney, and stomach) was detected by qRT-PCR. Animal experiments were repeated two independent times. Data represent mean  $\pm$  SD (n = 6), \*\* $p$  < 0.01 by unpaired t-test. Tf: transferrin.
