# Supplementary material for: Transferrin plays a central role in coagulation balance by interacting with clotting factors
Source: PubMed Central journal article supplement (PMC7015052; doi:10.1038/s41422-019-0260-6), 2019-12-06
Supplement: 41422_2019_260_MOESM5_ESM.pdf [file 41422_2019_260_MOESM5_ESM.pdf]

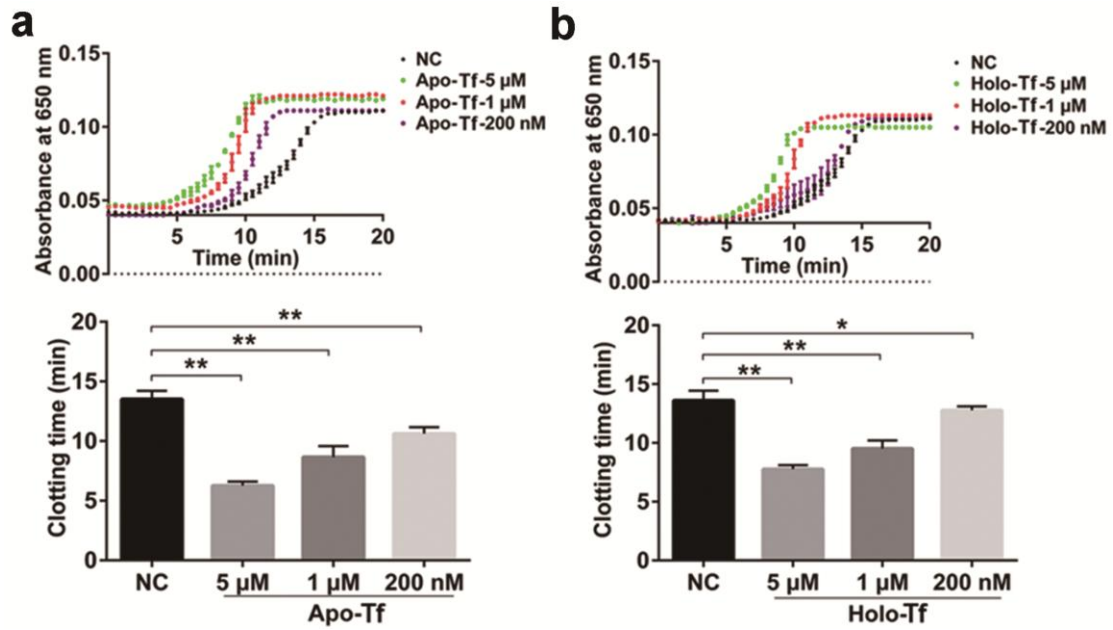

**Fig. S4 Effects of apo-transferrin and holo-transferrin on plasma recalcification**

**time.** Human plasma recalcification time was shortened by human apo-transferrin (a) and holo-transferrin (b). Clotting time (below) was calculated by measuring the time to half maximal increase in absorbance. Data represent mean  $\pm$  SD of six independent experiments, \* $p < 0.05$ , \*\* $p < 0.01$  by one-way ANOVA with Dunnett's post hoc test.

Tf: transferrin.
