# Supplementary material for: Transferrin plays a central role in coagulation balance by interacting with clotting factors
Source: PubMed Central journal article supplement (PMC7015052; doi:10.1038/s41422-019-0260-6), 2019-12-06
Supplement: 41422_2019_260_MOESM6_ESM.pdf [file 41422_2019_260_MOESM6_ESM.pdf]

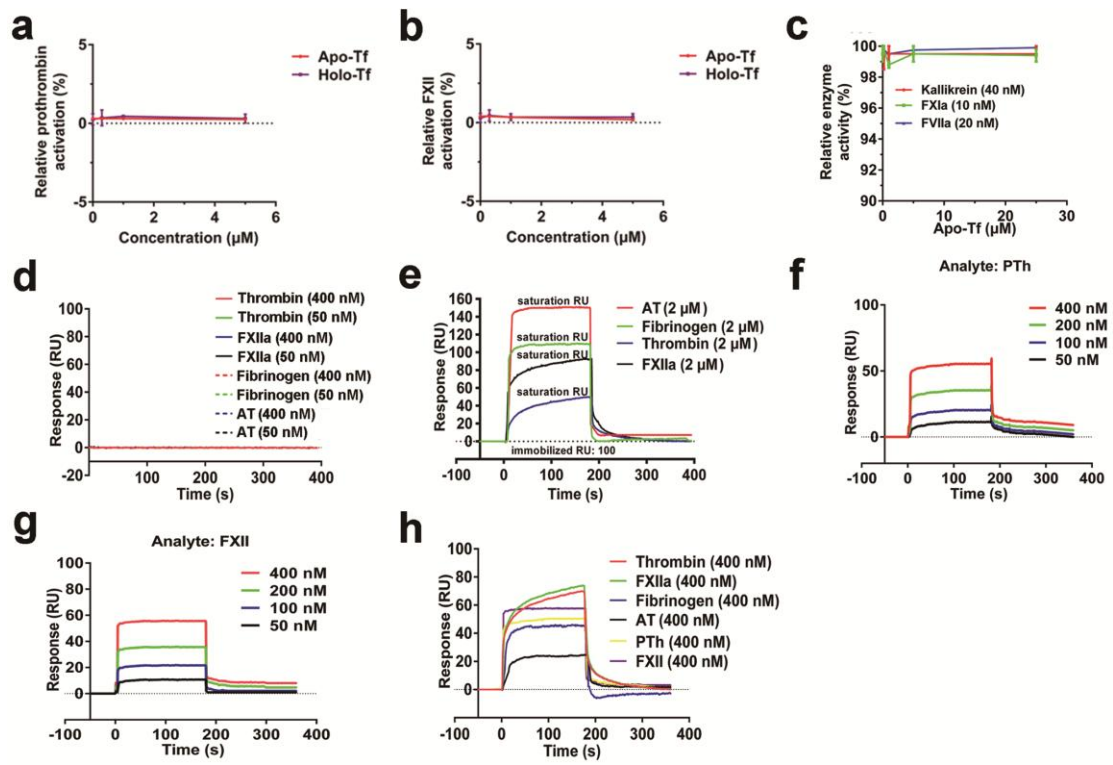

**Fig. S5 Effects of apo-transferrin and holo-transferrin on prothrombin/FXII activation and SPR analysis of transferrin and prothrombin/FXII interaction.**

Both apo-transferrin and holo-transferrin showed no influence on prothrombin (a) or FXII (b) activation. Data represent mean  $\pm$  SD of four independent experiments. (c) Apo-transferrin showed no influence on kallikrein, FXIa or FVIIa. Data represent mean  $\pm$  SD of six independent experiments. (d) SPR analysis of interactions between human serum albumin (HSA) and thrombin, FXIIa, fibrinogen or antithrombin (AT). (e) SPR analysis of binding molar ratio between transferrin and fibrinogen, AT, thrombin, and FXIIa. SPR analysis of interaction between transferrin and prothrombin (f) and FXII (g). (h) SPR analysis of interactions between holo-transferrin and thrombin, FXIIa, fibrinogen, AT, prothrombin (PTh), and FXII. Tf: transferrin.
