# Supplementary material for: Transferrin plays a central role in coagulation balance by interacting with clotting factors
Source: PubMed Central journal article supplement (PMC7015052; doi:10.1038/s41422-019-0260-6), 2019-12-06
Supplement: 41422_2019_260_MOESM7_ESM.pdf [file 41422_2019_260_MOESM7_ESM.pdf]

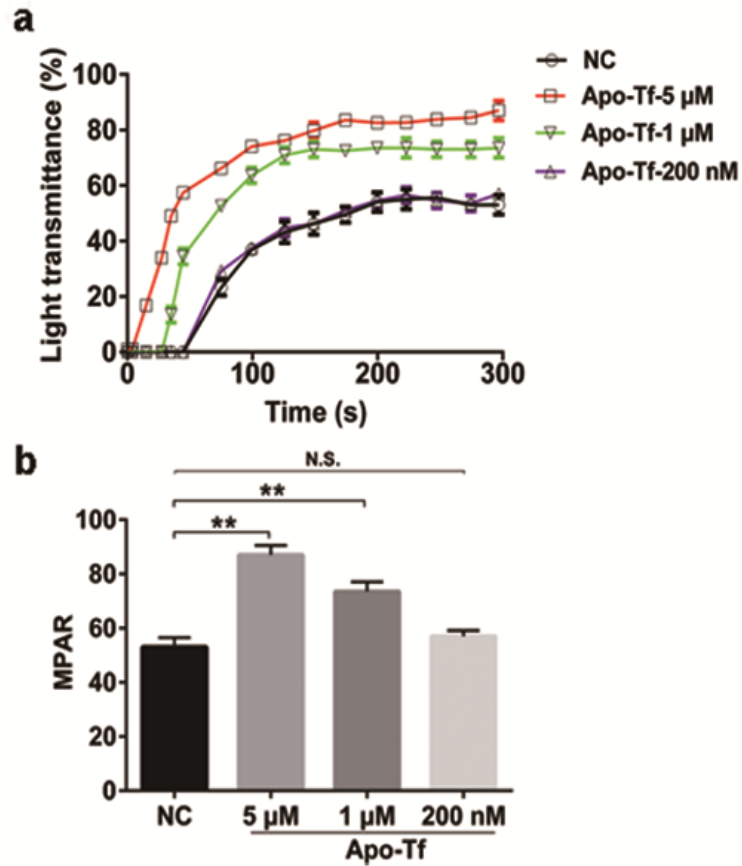

**Fig. S6 Effects of apo-transferrin on thrombin-induced platelet aggregation.**

Transferrin's effect on thrombin-induced platelet aggregation (**a**) and maximum platelet aggregation rate (MPAR) (**b**). Data represent mean  $\pm$  SD of six independent experiments,  $**p < 0.01$  by one-way ANOVA with Dunnett's post hoc test. Tf: transferrin.
