# Supplementary material for: Transferrin plays a central role in coagulation balance by interacting with clotting factors
Source: PubMed Central journal article supplement (PMC7015052; doi:10.1038/s41422-019-0260-6), 2019-12-06
Supplement: 41422_2019_260_MOESM11_ESM.pdf [file 41422_2019_260_MOESM11_ESM.pdf]

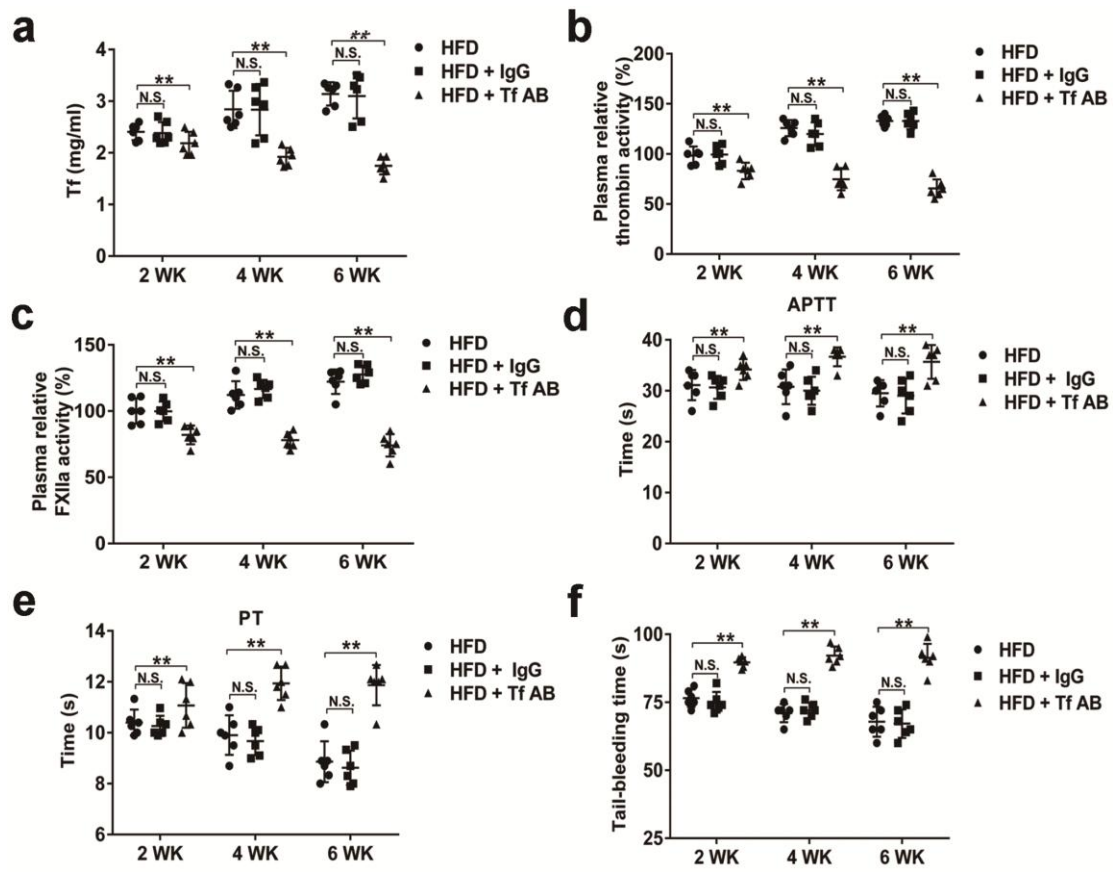

**Fig. S10 Anti-transferrin antibody treatment inhibits hypercoagulability *in vivo*.**

HFD-fed *Apoe*<sup>-/-</sup> mice were subjected to anti-transferrin antibody (Tf AB) or IgG treatment twice /week for 6 weeks. Plasma concentrations of transferrin (**a**), relative thrombin (**b**), and FXIIa activities (**c**) in plasma, APTT (**d**), PT (**e**), and tail-bleeding time (**f**) in *Apoe*<sup>-/-</sup> mice are shown. Data represent mean ± SD (n = 6), \*\*p < 0.01 by one-way ANOVA with Dunnett's post hoc test. N.S.: no significance; Tf: transferrin.
