# Supplementary material for: Transferrin plays a central role in coagulation balance by interacting with clotting factors
Source: PubMed Central journal article supplement (PMC7015052; doi:10.1038/s41422-019-0260-6), 2019-12-06
Supplement: 41422_2019_260_MOESM12_ESM.pdf [file 41422_2019_260_MOESM12_ESM.pdf]

**Table S1 Clinical features and plasma transferrin concentrations in patients with CHD.**

| Sex          | Age (years) | Main clinical features | Transferrin (mg/ml) |
|--------------|-------------|------------------------|---------------------|
| CHD patients |             |                        |                     |
| Female       | 54          | AP, AVLN               | 5.383               |
| Female       | 55          | AP, AVLN               | 3.019               |
| Female       | 61          | AP, AVLN               | 3.770               |
| Male         | 52          | AP, AVLN               | 6.098               |
| Female       | 68          | AP, AVLN               | 5.150               |
| Female       | 71          | AP, AVLN               | 4.244               |
| Male         | 64          | AP, AVLN               | 2.924               |
| Female       | 63          | AP, AVLN               | 5.208               |
| Male         | 43          | AP, AVLN               | 2.949               |
| Male         | 59          | AP, AVLN               | 7.120               |
| Female       | 68          | AP, AVLN               | 4.098               |
| Male         | 74          | AP, AVLN               | 4.600               |
| Male         | 60          | AP, AVLN               | 3.286               |
| Male         | 49          | AP, AVLN               | 3.250               |
| Male         | 57          | AP, AVLN               | 4.186               |
| Male         | 35          | AP, AVLN               | 3.162               |
| Female       | 69          | AP, AVLN               | 3.074               |
| Male         | 70          | AP, AVLN               | 2.920               |
| Female       | 44          | AP, AVLN               | 3.273               |
| Female       | 65          | AP, AVLN               | 7.104               |
| Female       | 79          | AP, AVLN               | 6.300               |
| Male         | 57          | AP, AVLN               | 3.690               |
| Female       | 39          | AP, AVLN               | 4.990               |
| Female       | 71          | AP, AVLN               | 3.180               |

|        |    |          |       |
|--------|----|----------|-------|
| Female | 67 | AP, AVLN | 3.280 |
| Female | 57 | AP, AVLN | 3.373 |
| Male   | 61 | AP, AVLN | 3.373 |
| Female | 58 | AP, AVLN | 5.518 |
| Male   | 64 | AP, AVLN | 3.373 |
| Male   | 70 | AP, AVLN | 3.295 |
| Male   | 61 | AP, AVLN | 3.373 |
| Female | 66 | AP, AVLN | 3.550 |
| Female | 71 | AP, AVLN | 5.050 |
| Female | 38 | AP, AVLN | 3.186 |
| Male   | 63 | AP, AVLN | 3.920 |
| Male   | 29 | AP, AVLN | 6.560 |
| Female | 46 | AP, AVLN | 5.220 |
| Male   | 58 | AP, AVLN | 3.373 |
| Male   | 39 | AP, AVLN | 3.200 |
| Male   | 71 | AP, AVLN | 5.070 |
| Male   | 56 | AP, AVLN | 3.135 |
| Male   | 67 | AP, AVLN | 4.940 |
| Female | 44 | AP, AVLN | 3.584 |
| Male   | 56 | AP, AVLN | 4.262 |
| Male   | 41 | AP, AVLN | 4.286 |
| Female | 59 | AP, AVLN | 3.850 |
| Female | 65 | AP, AVLN | 4.790 |
| Male   | 78 | AP, AVLN | 3.399 |
| Male   | 44 | AP, AVLN | 6.122 |
| Female | 23 | AP, AVLN | 4.392 |
| Male   | 73 | AP, AVLN | 4.103 |
| Male   | 49 | AP, AVLN | 7.780 |
| Male   | 69 | AP, AVLN | 3.580 |

|        |    |          |       |
|--------|----|----------|-------|
| Female | 63 | AP, AVLN | 5.379 |
| Female | 59 | AP, AVLN | 3.250 |
| Female | 39 | AP, AVLN | 4.926 |
| Female | 59 | AP, AVLN | 5.670 |
| Male   | 38 | AP, AVLN | 3.390 |
| Male   | 53 | AP, AVLN | 4.390 |
| Female | 67 | AP, AVLN | 4.350 |
| Female | 49 | AP, AVLN | 3.450 |
| Female | 55 | AP, AVLN | 4.046 |
| Female | 73 | AP, AVLN | 3.201 |
| Male   | 59 | AP, AVLN | 4.450 |
| Female | 43 | AP, AVLN | 4.850 |
| Male   | 69 | AP, AVLN | 3.562 |
| Female | 71 | AP, AVLN | 2.650 |
| Female | 49 | AP, AVLN | 3.670 |
| Male   | 45 | AP, AVLN | 6.114 |
| Male   | 48 | AP, AVLN | 3.750 |
| Female | 61 | AP, AVLN | 2.940 |
| Female | 65 | AP, AVLN | 3.342 |
| Male   | 71 | AP, AVLN | 5.550 |
| Male   | 56 | AP, AVLN | 3.890 |
| Male   | 65 | AP, AVLN | 3.506 |
| Male   | 40 | AP, AVLN | 3.010 |
| Female | 73 | AP, AVLN | 5.550 |
| Male   | 39 | AP, AVLN | 3.950 |
| Female | 36 | AP, AVLN | 2.940 |
| Female | 60 | AP, AVLN | 3.519 |
| Male   | 34 | AP, AVLN | 5.500 |
| Female | 74 | AP, AVLN | 5.850 |

|        |    |          |       |
|--------|----|----------|-------|
| Female | 61 | AP, AVLN | 5.930 |
| Male   | 59 | AP, AVLN | 4.400 |
| Female | 52 | AP, AVLN | 3.795 |
| Female | 65 | AP, AVLN | 3.849 |
| Female | 55 | AP, AVLN | 3.620 |
| Male   | 72 | AP, AVLN | 6.000 |
| Male   | 44 | AP, AVLN | 4.290 |
| Male   | 64 | AP, AVLN | 5.500 |
| Female | 50 | AP, AVLN | 3.762 |
| Male   | 63 | AP, AVLN | 3.840 |
| Female | 59 | AP, AVLN | 4.400 |
| Female | 38 | AP, AVLN | 3.650 |
| Male   | 58 | AP, AVLN | 4.246 |
| Female | 51 | AP, AVLN | 4.849 |
| Male   | 56 | AP, AVLN | 3.949 |
| Male   | 69 | AP, AVLN | 3.850 |
| Male   | 59 | AP, AVLN | 4.600 |
| Female | 55 | AP, AVLN | 3.610 |
| Female | 54 | AP, AVLN | 4.244 |
| Male   | 70 | AP, AVLN | 4.430 |
| Male   | 49 | AP, AVLN | 4.950 |
| Male   | 46 | AP, AVLN | 3.030 |
| Female | 67 | AP, AVLN | 3.800 |
| Female | 54 | AP, AVLN | 3.650 |
| Female | 67 | AP, AVLN | 5.560 |
| Female | 52 | AP, AVLN | 5.510 |
| Male   | 73 | AP, AVLN | 5.280 |
| Female | 69 | AP, AVLN | 3.084 |
| Female | 28 | AP, AVLN | 5.926 |

|                               |    |          |       |
|-------------------------------|----|----------|-------|
| Male                          | 76 | AP, AVLN | 4.750 |
| Male                          | 45 | AP, AVLN | 3.870 |
| Male                          | 50 | AP, AVLN | 5.379 |
| Female                        | 69 | AP, AVLN | 4.350 |
| Female                        | 66 | AP, AVLN | 3.003 |
| Female                        | 67 | AP, AVLN | 5.379 |
| Male                          | 44 | AP, AVLN | 5.750 |
| Male                          | 70 | AP, AVLN | 3.862 |
| Male                          | 59 | AP, AVLN | 3.820 |
| Controls (healthy volunteers) |    |          |       |
| Male                          | 39 | NA       | 2.500 |
| Male                          | 48 | NA       | 2.570 |
| Male                          | 34 | NA       | 3.613 |
| Male                          | 54 | NA       | 2.491 |
| Female                        | 38 | NA       | 2.524 |
| Female                        | 27 | NA       | 3.050 |
| Female                        | 60 | NA       | 2.557 |
| Female                        | 27 | NA       | 2.510 |
| Male                          | 65 | NA       | 2.832 |
| Male                          | 33 | NA       | 2.520 |
| Female                        | 43 | NA       | 2.840 |
| Male                          | 59 | NA       | 3.250 |
| Female                        | 39 | NA       | 2.810 |
| Female                        | 51 | NA       | 3.327 |
| Male                          | 67 | NA       | 3.500 |
| Female                        | 51 | NA       | 3.450 |
| Male                          | 45 | NA       | 3.150 |
| Female                        | 36 | NA       | 3.199 |
| Female                        | 39 | NA       | 3.261 |

|        |    |    |       |
|--------|----|----|-------|
| Male   | 47 | NA | 2.810 |
| Male   | 29 | NA | 2.810 |
| Male   | 42 | NA | 3.415 |
| Male   | 67 | NA | 2.690 |
| Male   | 45 | NA | 3.150 |
| Female | 42 | NA | 2.810 |
| Female | 65 | NA | 2.865 |
| Female | 27 | NA | 2.832 |
| Male   | 45 | NA | 2.568 |
| Male   | 45 | NA | 2.568 |
| Male   | 62 | NA | 3.250 |
| Female | 33 | NA | 3.150 |
| Male   | 45 | NA | 2.650 |
| Female | 27 | NA | 2.673 |
| Female | 37 | NA | 2.940 |
| Female | 34 | NA | 2.950 |
| Female | 76 | NA | 2.590 |
| Male   | 57 | NA | 2.450 |
| Female | 21 | NA | 2.550 |
| Female | 49 | NA | 2.520 |
| Male   | 36 | NA | 2.240 |
| Female | 32 | NA | 2.450 |
| Male   | 38 | NA | 2.579 |
| Female | 49 | NA | 2.460 |
| Male   | 78 | NA | 2.920 |
| Male   | 54 | NA | 2.250 |
| Male   | 44 | NA | 2.990 |
| Female | 68 | NA | 2.500 |
| Male   | 29 | NA | 3.294 |

|        |    |    |       |
|--------|----|----|-------|
| Female | 50 | NA | 2.392 |
| Female | 57 | NA | 2.920 |
| Male   | 56 | NA | 2.832 |
| Female | 38 | NA | 3.327 |
| Male   | 63 | NA | 2.722 |
| Male   | 59 | NA | 2.711 |
| Female | 67 | NA | 2.953 |
| Female | 60 | NA | 2.620 |
| Female | 61 | NA | 2.400 |
| Male   | 41 | NA | 2.840 |
| Female | 55 | NA | 2.980 |
| Male   | 39 | NA | 2.950 |
| Male   | 39 | NA | 2.667 |
| Male   | 42 | NA | 3.730 |
| Female | 59 | NA | 2.850 |
| Female | 45 | NA | 2.450 |
| Male   | 67 | NA | 3.450 |
| Female | 45 | NA | 2.220 |
| Male   | 42 | NA | 2.780 |
| Male   | 65 | NA | 2.600 |
| Female | 47 | NA | 2.550 |
| Female | 49 | NA | 2.690 |
| Male   | 35 | NA | 2.900 |
| Female | 62 | NA | 2.980 |
| Male   | 44 | NA | 2.950 |
| Female | 45 | NA | 2.640 |
| Female | 29 | NA | 3.150 |
| Female | 57 | NA | 2.850 |
| Male   | 39 | NA | 2.350 |

|        |    |    |       |
|--------|----|----|-------|
| Male   | 77 | NA | 2.561 |
| Female | 57 | NA | 2.510 |
| Male   | 26 | NA | 2.730 |
| Male   | 59 | NA | 2.850 |
| Female | 72 | NA | 2.950 |
| Male   | 32 | NA | 2.730 |
| Male   | 71 | NA | 2.350 |
| Male   | 66 | NA | 3.494 |
| Female | 51 | NA | 2.900 |
| Female | 48 | NA | 3.250 |
| Male   | 45 | NA | 3.160 |
| Female | 42 | NA | 2.517 |
| Female | 39 | NA | 3.062 |
| Female | 54 | NA | 3.080 |
| Male   | 50 | NA | 3.072 |
| Male   | 67 | NA | 3.613 |
| Female | 71 | NA | 3.503 |
| Male   | 42 | NA | 3.294 |
| Male   | 22 | NA | 2.300 |
| Female | 66 | NA | 2.350 |
| Female | 37 | NA | 2.295 |
| Male   | 59 | NA | 2.550 |
| Female | 55 | NA | 2.535 |
| Female | 52 | NA | 3.690 |
| Male   | 49 | NA | 2.447 |
| Female | 42 | NA | 2.500 |
| Male   | 30 | NA | 3.150 |
| Female | 73 | NA | 2.250 |
| Male   | 30 | NA | 2.350 |



|        |    |    |       |
|--------|----|----|-------|
| Female | 66 | NA | 2.500 |
| Female | 65 | NA | 2.320 |
| Male   | 60 | NA | 2.650 |
| Female | 48 | NA | 2.290 |
| Female | 52 | NA | 2.384 |
| Male   | 31 | NA | 2.579 |
| Male   | 67 | NA | 3.052 |
| Male   | 66 | NA | 2.579 |
| Male   | 23 | NA | 2.524 |
| Female | 45 | NA | 2.900 |
| Female | 32 | NA | 3.650 |
| Male   | 31 | NA | 2.620 |
| Male   | 55 | NA | 3.050 |
| Female | 60 | NA | 2.950 |

AP: angina pectoris; AVLN: angiographically visible luminal narrowing; NA: not applicable.
