# Supplementary material for: Transferrin plays a central role in coagulation balance by interacting with clotting factors
Source: PubMed Central journal article supplement (PMC7015052; doi:10.1038/s41422-019-0260-6), 2019-12-06
Supplement: 41422_2019_260_MOESM13_ESM.pdf [file 41422_2019_260_MOESM13_ESM.pdf]

**Table S2 Clinical features of atherosclerotic plaque donors.**

| Sex              | Age (years) | Main clinical features |
|------------------|-------------|------------------------|
| AS plaque donors |             |                        |
| Male             | 70          | AP, AVLN               |
| Male             | 67          | AP, AVLN               |
| Male             | 65          | AP, AVLN               |
| Female           | 49          | AP, AVLN               |
| Female           | 54          | AP, AVLN               |
| Female           | 60          | AP, AVLN               |
| Female           | 63          | AP, AVLN               |
| Male             | 42          | AP, AVLN               |
| Female           | 50          | AP, AVLN               |
| Female           | 68          | AP, AVLN               |
| Male             | 71          | AP, AVLN               |
| Male             | 63          | AP, AVLN               |

AP: angina pectoris; AVLN: angiographically visible luminal narrowing.
