# Supplementary material for: Transferrin plays a central role in coagulation balance by interacting with clotting factors
Source: PubMed Central journal article supplement (PMC7015052; doi:10.1038/s41422-019-0260-6), 2019-12-06
Supplement: 41422_2019_260_MOESM14_ESM.pdf [file 41422_2019_260_MOESM14_ESM.pdf]

**Table S3 The association rate constant ( $Ka$ ), dissociation rate constant ( $Kd$ ), and equilibrium dissociation constant ( $KD$ ) values for the interaction between apo-transferrin and thrombin, FXIIa, fibrinogen, or antithrombin.**

|               | $Ka$ ( $M^{-1}s^{-1}$ ) | $Kd$ ( $s^{-1}$ )    | $KD$ (nM) |
|---------------|-------------------------|----------------------|-----------|
| Tf-thrombin   | $4.7 \times 10^5$       | $3.6 \times 10^{-3}$ | 7.7       |
| Tf-FXIIa      | $1.8 \times 10^5$       | $2.5 \times 10^{-3}$ | 13.9      |
| Tf-fibrinogen | $3.4 \times 10^4$       | $1.0 \times 10^{-3}$ | 29.0      |
| Tf-AT         | $2.1 \times 10^3$       | $1.1 \times 10^{-3}$ | 524.0     |

Tf: transferrin; AT: antithrombin.
