# Supplementary material for: Transferrin plays a central role in coagulation balance by interacting with clotting factors
Source: PubMed Central journal article supplement (PMC7015052; doi:10.1038/s41422-019-0260-6), 2019-12-06
Supplement: 41422_2019_260_MOESM15_ESM.pdf [file 41422_2019_260_MOESM15_ESM.pdf]

**Table S4 Iron metabolism indices (iron, ferritin) and erythrocyte indices (MCV, MCH, MCHC) of normal mice (NC), transferrin overexpression (PLP-Tf), knockdown (RNR-Tf), anti-transferrin antibody (Tf AB), and IgG treatment mice.**

|        | Iron<br>( $\mu\text{M/L}$ ) | Ferritin<br>( $\mu\text{g/L}$ ) | MCV<br>(fL) | MCH<br>(pg) | MCHC<br>(g/L) |
|--------|-----------------------------|---------------------------------|-------------|-------------|---------------|
| NC     | 16.4 (1.34)                 | 72.2 (2.97)                     | 44.8 (2.12) | 14.2 (1.21) | 307 (6.73)    |
| PLP-Tf | 16.1 (1.96)                 | 71.5 (3.45)                     | 43.5 (3.91) | 13.9 (1.98) | 310 (5.89)    |
| RNR-Tf | 16.5 (1.15)                 | 70.9 (1.95)                     | 44.1 (2.54) | 14.4 (1.31) | 309 (7.21)    |
| Tf AB  | 16.0 (1.52)                 | 73 (3.14)                       | 44.0 (2.34) | 14.5 (1.34) | 312 (6.21)    |
| IgG    | 16.2 (1.23)                 | 71 (2.34)                       | 45.1 (3.24) | 14.1 (2.11) | 305 (5.89)    |

MCV: mean corpuscular volume; MCH: mean corpuscular hemoglobin; MCHC: mean corpuscular hemoglobin concentration. Data represent mean (SD), n = 10.
